# Supplementary material for: Antidiabetic Sterols from Peniocereus greggii Roots
Source: PubMed Central journal article supplement — ACS Omega. 2022 Apr 8;7(15):13144–54. doi: 10.1021/acsomega.2c00595 (PMC9026134; doi:10.1021/acsomega.2c00595), 2022-04-08
Supplement: ao2c00595_si_001.pdf [file ao2c00595_si_001.pdf]

*Supporting information for*

**Antidiabetic Sterols from *Peniocereus greggii* Roots**

R. Jenifer Muñoz-Gómez,<sup>1</sup> Isabel Rivero-Cruz,<sup>1</sup> Berenice Ovalle-Magallanes,<sup>1\*</sup> Edelmira Linares,<sup>2</sup> Robert Bye,<sup>2</sup> Armando R. Tovar,<sup>3</sup> Lilia G. Noriega,<sup>3</sup> Claudia Tovar-Palacio,<sup>4</sup> Rachel Mata<sup>1\*</sup>

<sup>1</sup> Facultad de Química, Universidad Nacional Autónoma de México, Ciudad de México 04510, México.

<sup>2</sup> Jardín Botánico, Instituto de Biología, Universidad Nacional Autónoma de México, Ciudad de México 04510, México

<sup>3</sup> Departamento de Fisiología de la Nutrición, Instituto Nacional Ciencias Médicas y Nutrición “Salvador Zubirán”, Ciudad de México 14080, México.

<sup>4</sup> Dirección de Nutrición, Instituto Nacional Ciencias Médicas y Nutrición “Salvador Zubirán”, Ciudad de México 14080, México.

|                    | <b>Content</b>                                                                                                                                              | <b>Page</b> |
|--------------------|-------------------------------------------------------------------------------------------------------------------------------------------------------------|-------------|
| <b>Table S1.</b>   | Spectroscopic data of compounds <b>2–5</b> in CDCl <sub>3</sub> (400 MHz for <sup>1</sup> H NMR and 100 MHz for <sup>13</sup> C NMR)                        | <b>S3</b>   |
| <b>Figure S1.</b>  | Effect of PGD on glucose level on hypoglycemic (A) and OSTT (B) experiments in normoglycemic mice                                                           | <b>S4</b>   |
| <b>Figure S2.</b>  | LC chromatograms of the CHCl <sub>3</sub> extracts (CE1; A) and (CE2; B).                                                                                   | <b>S5</b>   |
| <b>Figure S3.</b>  | FTIR spectrum by ATR of compound ( <b>6</b> )                                                                                                               | <b>S6</b>   |
| <b>Figure S4.</b>  | <sup>1</sup> H NMR spectrum of compound <b>6</b> in CDCl <sub>3</sub>                                                                                       | <b>S6</b>   |
| <b>Figure S5.</b>  | <sup>13</sup> C NMR spectrum of compound <b>6</b> in CDCl <sub>3</sub>                                                                                      | <b>S7</b>   |
| <b>Figure S6.</b>  | COSY spectrum of compound <b>6</b> in CDCl <sub>3</sub>                                                                                                     | <b>S7</b>   |
| <b>Figure S7.</b>  | HSQC spectrum of compound <b>6</b> in CDCl <sub>3</sub>                                                                                                     | <b>S8</b>   |
| <b>Figure S8.</b>  | HMBC spectrum of compound <b>6</b> in CDCl <sub>3</sub>                                                                                                     | <b>S8</b>   |
| <b>Figure S9.</b>  | NOESY spectrum of compound <b>6</b> in CDCl <sub>3</sub>                                                                                                    | <b>S9</b>   |
| <b>Figure S10.</b> | FTIR spectrum by ATR of peniocerol ( <b>2</b> )                                                                                                             | <b>S10</b>  |
| <b>Figure S11.</b> | <sup>1</sup> H NMR spectrum of peniocerol ( <b>2</b> ) in CDCl <sub>3</sub>                                                                                 | <b>S10</b>  |
| <b>Figure S12.</b> | <sup>13</sup> C NMR spectrum of peniocerol ( <b>2</b> ) in CDCl <sub>3</sub>                                                                                | <b>S11</b>  |
| <b>Figure S13.</b> | COSY spectrum of peniocerol ( <b>2</b> ) in CDCl <sub>3</sub>                                                                                               | <b>S11</b>  |
| <b>Figure S14.</b> | HSQC spectrum of peniocerol ( <b>2</b> ) in CDCl <sub>3</sub>                                                                                               | <b>S12</b>  |
| <b>Figure S15.</b> | ECD spectrum of peniocerol ( <b>2</b> ) in CDCl <sub>3</sub>                                                                                                | <b>S12</b>  |
| <b>Figure S16.</b> | <sup>1</sup> H NMR spectrum of desoxyviperidone ( <b>3</b> ) in CDCl <sub>3</sub>                                                                           | <b>S13</b>  |
| <b>Figure S17.</b> | <sup>13</sup> C NMR spectrum of desoxyviperidone ( <b>3</b> ) in CDCl <sub>3</sub>                                                                          | <b>S13</b>  |
| <b>Figure S18.</b> | HSQC spectrum of desoxyviperidone ( <b>3</b> ) in CDCl <sub>3</sub>                                                                                         | <b>S14</b>  |
| <b>Figure S19.</b> | <sup>1</sup> H NMR spectrum of viperidone ( <b>4</b> ) in CDCl <sub>3</sub>                                                                                 | <b>S14</b>  |
| <b>Figure S20.</b> | <sup>13</sup> C NMR spectrum of viperidone ( <b>4</b> ) in CDCl <sub>3</sub>                                                                                | <b>S15</b>  |
| <b>Figure S21.</b> | FTIR spectrum by ATR of viperidinone ( <b>5</b> )                                                                                                           | <b>S15</b>  |
| <b>Figure S22.</b> | <sup>1</sup> H NMR spectrum of viperidinone ( <b>5</b> ) in CDCl <sub>3</sub>                                                                               | <b>S16</b>  |
| <b>Figure S23.</b> | <sup>13</sup> C NMR spectrum of viperidinone ( <b>5</b> ) in CDCl <sub>3</sub>                                                                              | <b>S16</b>  |
| <b>Figure S24.</b> | COSY spectrum of viperidinone ( <b>5</b> ) in CDCl <sub>3</sub>                                                                                             | <b>S17</b>  |
| <b>Figure S25.</b> | HSQC spectrum of viperidinone ( <b>5</b> ) in CDCl <sub>3</sub>                                                                                             | <b>S17</b>  |
| <b>Figure S26.</b> | Oxygen consumption rate (A, C and E) and extracellular acidification rate (B, D and F) in mouse myoblast cells C2C12 for compounds <b>2, 3</b> and <b>6</b> | <b>S18</b>  |
| <b>Table S2.</b>   | Linearity, Sensitivity, Precision and Accuracy for <b>3</b> and <b>4</b>                                                                                    | <b>S19</b>  |
| <b>Table S3.</b>   | Quantification of <b>3</b> and <b>4</b> (Batches I-IV) from <i>P. greggii</i>                                                                               | <b>S19</b>  |

**Table S1.** Spectroscopic data of compounds **2–5** in CDCl<sub>3</sub> (400 MHz for <sup>1</sup>H NMR and 100 MHz for <sup>13</sup>C NMR).

| No. | <b>2</b>        |                                  | <b>3</b>        |                                  | <b>4</b>        |                                  | <b>5</b>        |                                  |
|-----|-----------------|----------------------------------|-----------------|----------------------------------|-----------------|----------------------------------|-----------------|----------------------------------|
|     | <sup>13</sup> C | <sup>1</sup> H ( <i>J</i> in Hz) | <sup>13</sup> C | <sup>1</sup> H ( <i>J</i> in Hz) | <sup>13</sup> C | <sup>1</sup> H ( <i>J</i> in Hz) | <sup>13</sup> C | <sup>1</sup> H ( <i>J</i> in Hz) |
| 1   | 35.4            | 1.73 m                           | 36.8            | 1.33 m; 1.83 m                   | 30.3            | 1.95 m; 2.15 m                   | 28.9            | 2.01 m                           |
| 2   | 31.0            | 1.83 m                           | 30.4            | 1.84 m; 2.20 m                   | 30.7            | 1.30 m; 1.82 m                   | 30.3            | 1.88 m                           |
| 3   | 71.2            | 3.58 dd (10.6, 4.8)              | 70.8            | 3.61 d (10.8, 4.1)               | 70.3            | 3.63 d (11.2, 4.4)               | 70.2            | 3.63 d (11.2, 5.6)               |
| 4   | 32.0            | 2.20 m                           | 30.9            | 1.41 m                           | 29.7            | 1.35 m; 2.05 m                   | 30.2            | 1.39 m; 2.23 m                   |
| 5   | 47.8            | 1.35 m                           | 53.3            | 2.23 m                           | 44.7            | 2.82 d (12.3, 3.8)               | 46.8            | 3.13 d (12.3, 3.8)               |
| 6   | 67.6            | 3.71 m                           | 199.7           | /                                | 199.2           | /                                | 201.5           | /                                |
| 7   | 37.8            | 2.45 dd (17.1, 6.6)              | 123.1           | 5.73 s                           | 123.9           | 5.67 s                           | 124.1           | 5.87 s                           |
| 8   | 126.6           | /                                | 163.9           | /                                | 160.9           | /                                | 158.1           | /                                |
| 9   | 135.2           | /                                | 50.1            | 2.13 m                           | 74.0            | /                                | 74.3            | /                                |
| 10  | 37.7            | /                                | 38.2            | /                                | 41.9            | /                                | 42.5            | /                                |
| 11  | 22.8            | 2.07 m                           | 21.9            | 1.64 m; 1.78 m                   | 28.0            | 1.40 m; 2.05 m                   | 28.0            | 1.74 m; 1.99 m                   |
| 12  | 36.0            | 1.32 m                           | 30.3            | 1.41 m; 1.83 m                   | 28.0            | 1.70 m; 1.99 m                   | 27.8            | 2.12 m                           |
| 13  | 42.1            | /                                | 44.5            | /                                | 46.5            | /                                | 46.5            | /                                |
| 14  | 51.6            | 2.06 m                           | 55.6            | 2.0 dd (12.0, 4.1)               | 51.9            | 2.5 ddd (11.7, 6.8, 2.2)         | 50.4            | 1.93 m                           |
| 15  | 23.8            | 1.13 m                           | 22.6            | 1.48 m; 1.61 m                   | 23.8            | 1.52 m; 1.64 m                   | 26.3            | 1.43 m; 2.01 m                   |
| 16  | 28.9            | 1.29 m                           | 38.8            | 1.30 m; 2.13 m                   | 35.3            | 1.40 m                           | 31.7            | 1.58 m; 1.96 m                   |
| 17  | 54.9            | 1.14 m                           | 56.2            | 1.29 m                           | 56.2            | 1.40 m                           | 86.8            | /                                |
| 18  | 11.3            | 0.59 s                           | 12.2            | 0.58 s                           | 11.8            | 0.62 s                           | 16.1            | 0.71 s                           |
| 19  | 18.9            | 0.96 s                           | 13.2            | 0.96 s                           | 16.8            | 0.98 s                           | 16.6            | 0.95 s                           |
| 20  | 36.7            | 1.38 m                           | 35.9            | 1.38 m                           | 35.9            | 1.42 m                           | 35.6            | 1.44 m                           |
| 21  | 18.7            | 0.90 d (6.5)                     | 18.8            | 0.94 d (6.5)                     | 18.8            | 0.94 d (5.6)                     | 18.9            | 0.95 d (6.0)                     |
| 22  | 36.2            | 0.98 m                           | 35.9            | 1.01 m; 1.35 m                   | 35.9            | 1.35 m; 1.50 m                   | 36.2            | 1.06 m; 1.38 m                   |
| 23  | 23.8            | 1.58 m                           | 23.8            | 1.32 m                           | 22.8            | 1.20 m; 1.40 m                   | 23.9            | 1.06 m; 1.38 m                   |
| 24  | 39.6            | 1.11 m                           | 39.4            | 1.11 m                           | 39.4            | 1.16 m                           | 39.4            | 1.13 m                           |
| 25  | 28.1            | 1.49 m                           | 27.9            | 1.50 m                           | 28.6            | 1.54 m                           | 28.0            | 1.52 m                           |
| 26  | 22.7            | 0.84 d (6.5)                     | 22.5            | 0.84 d (6.5)                     | 22.5            | 0.86 d (6.5)                     | 22.5            | 0.81 d (6.5)                     |
| 27  | 23.0            | 0.85 d (6.5)                     | 22.8            | 0.86 d (6.5)                     | 22.6            | 0.88 d (6.5)                     | 22.8            | 0.88 d (6.5)                     |

**A**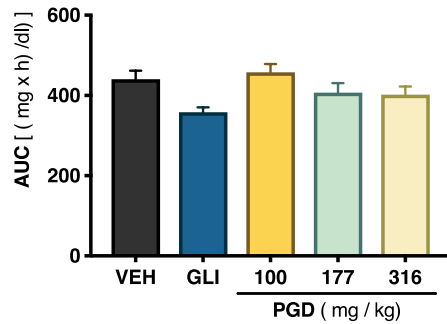**B**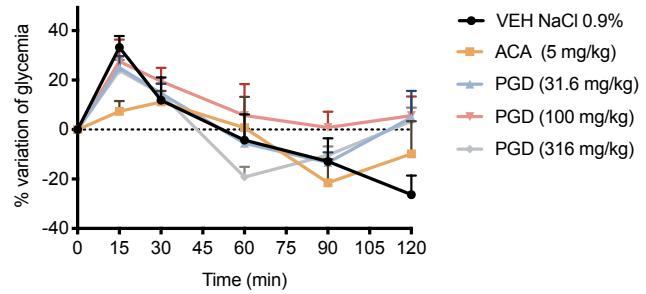

**Figure S1.** Effect of PGD on glucose level on hypoglycemic (A) and OSTT (B) experiments in normoglycemic mice. AUC: area under the curve; VEH: vehicle; GLI: glibenclamide (10 mg/kg); ACA: acarbose (5 mg/kg). Data are expressed as mean  $\pm$  SEM ( $n = 6$ ). \*  $p < 0.05$  and \*\*  $p < 0.01$  significantly different. ANOVA followed by Dunnett *post hoc* test for comparison with respect to vehicle control.

**A)**

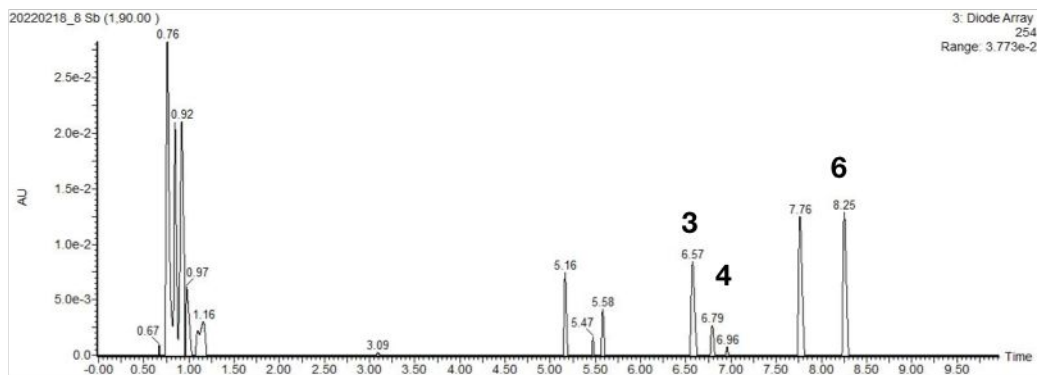

**B)**

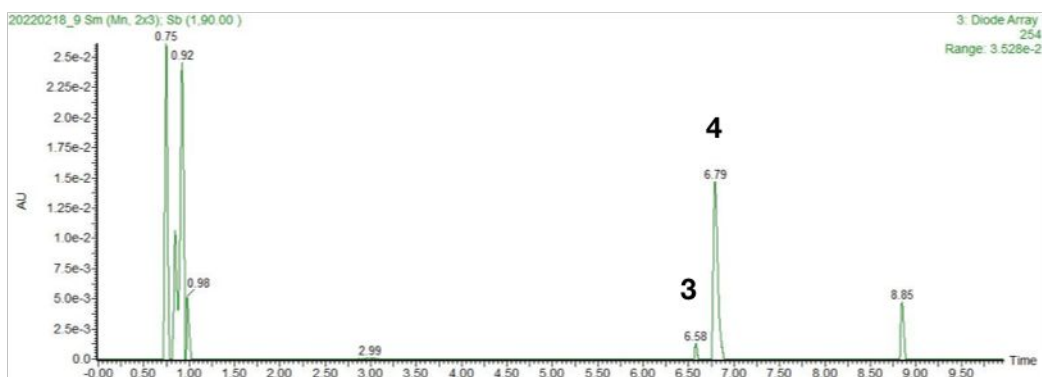

**Figure S2.** LC chromatograms of the  $\text{CHCl}_3$  extracts (CE1; A) and (CE2; B). The elution program was as follows: 0 min, 50% A; 1.0 min 50% A; 3.0 min 85% A; 5.0 min 90% A; 7.0 min 100% A; 9.0 min 100% A; 9.10 min 50% A; 11.0 min 50% A (mobile phase consisting of 50% methanol (A) and water adjusted to pH 2.8 with formic acid (FA; B)). Flow rate: 0.3 mL/min; Injection volume: 3  $\mu\text{L}$ .

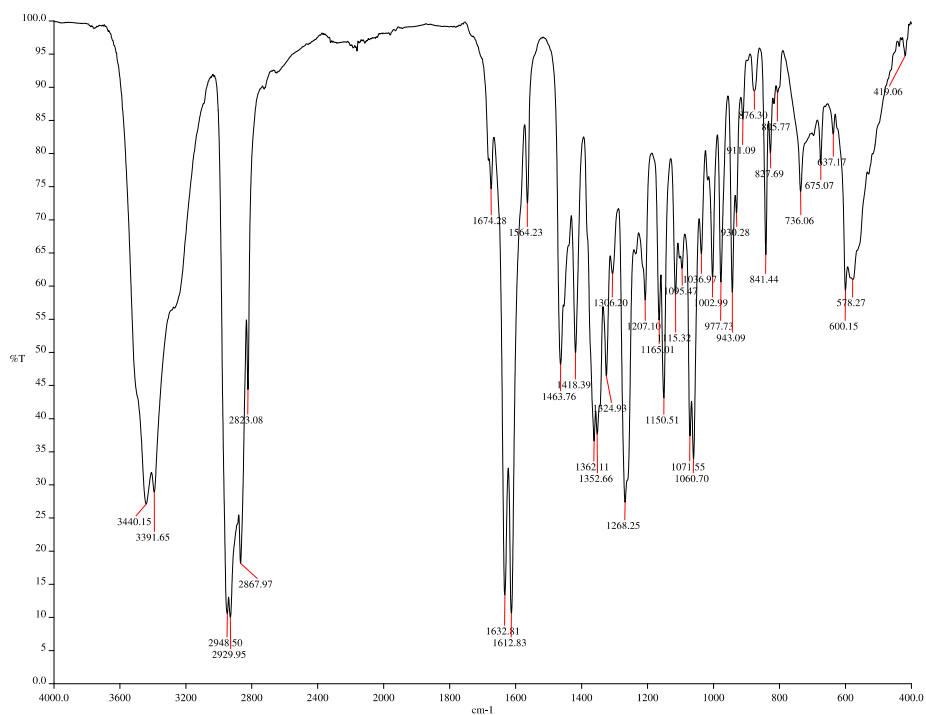

**Figure S3.** FTIR spectrum by ATR of compound (6)

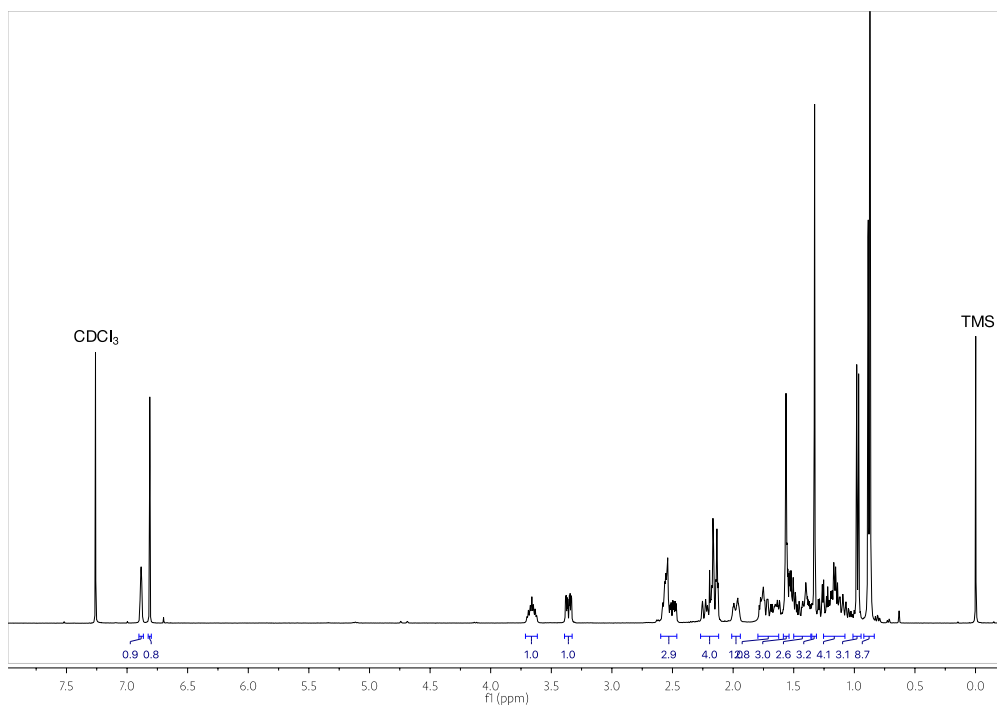

**Figure S4.** <sup>1</sup>H NMR spectrum of compound 6 in CDCl<sub>3</sub>

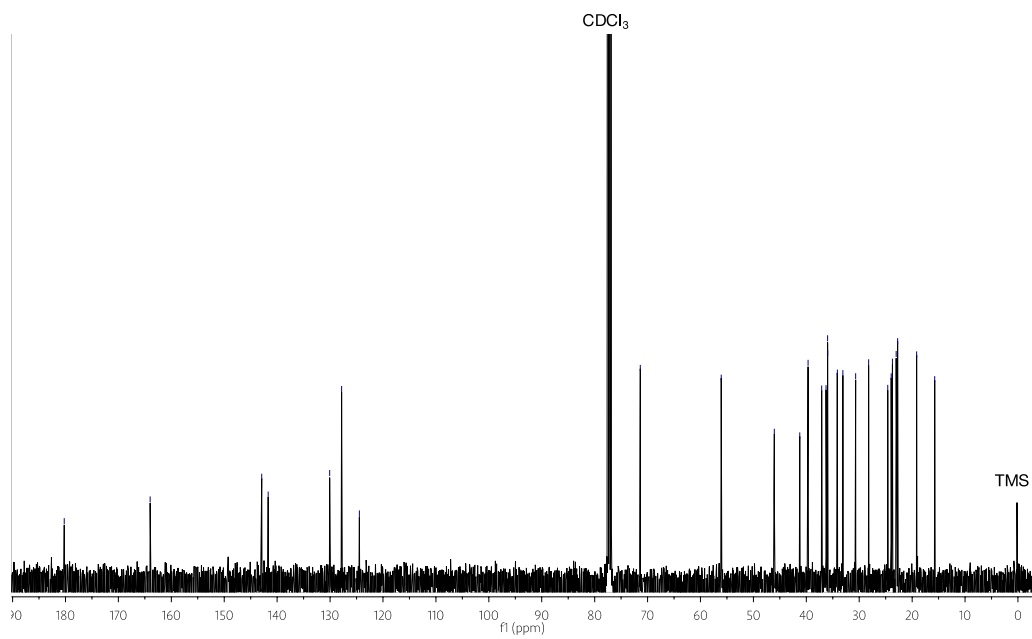

**Figure S5.**  $^{13}\text{C}$  NMR spectrum of compound **6** in  $\text{CDCl}_3$

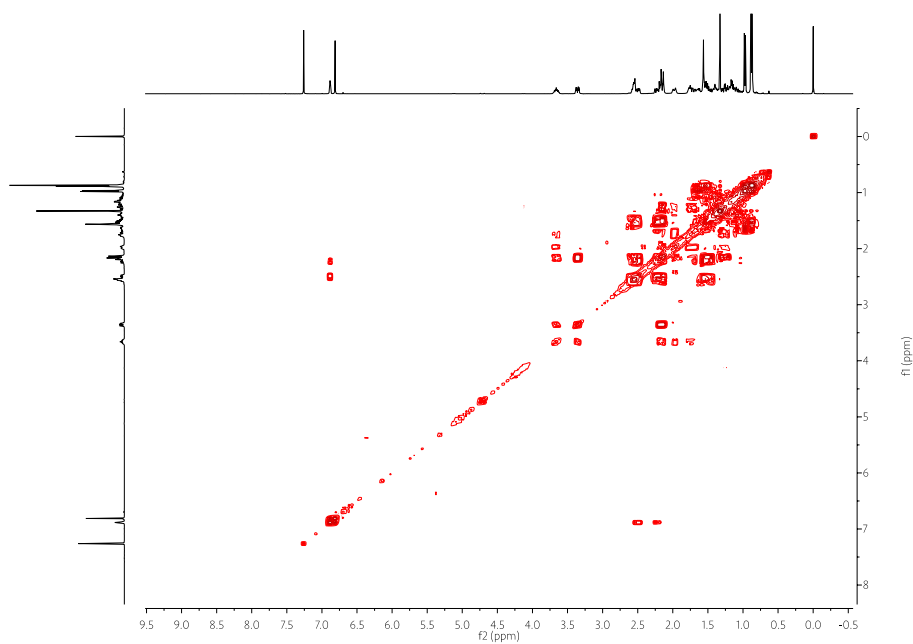

**Figure S6.** COSY spectrum of compound **6** in  $\text{CDCl}_3$

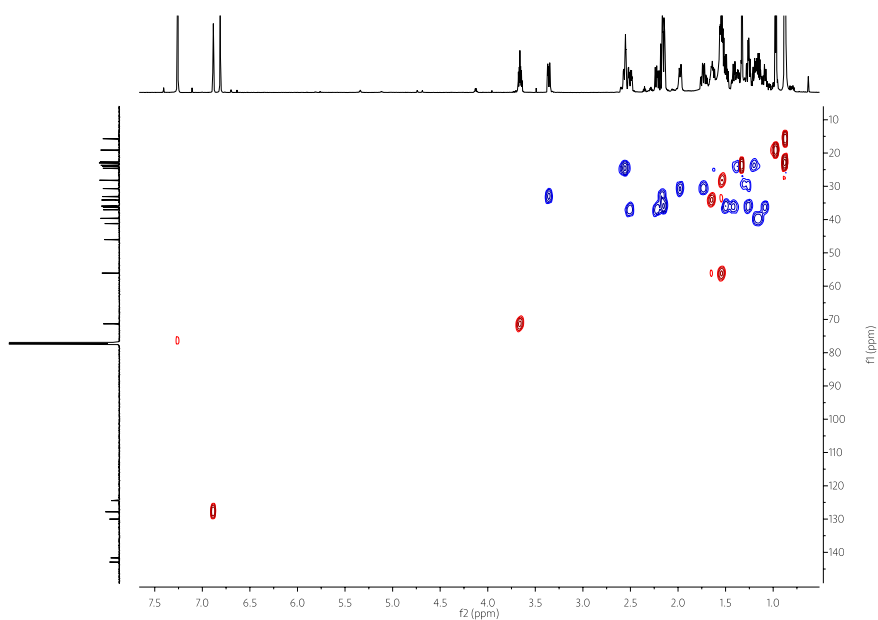

**Figure S7.** HSQC spectrum of compound **6** in  $\text{CDCl}_3$

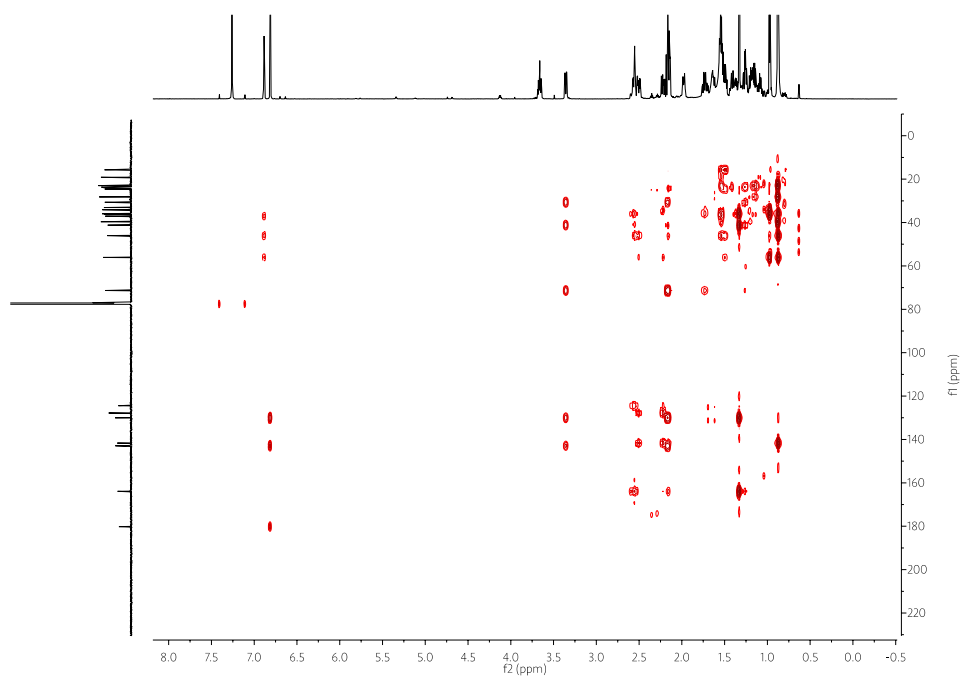

**Figure S8.** HMBC spectrum of compound **6** in  $\text{CDCl}_3$



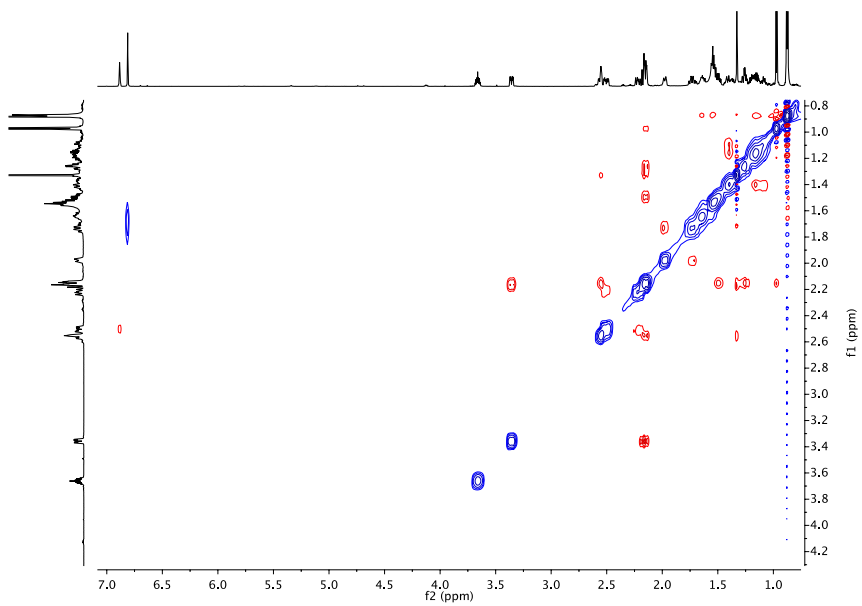

**Figure S9.** NOESY spectrum of compound **6** in  $\text{CDCl}_3$

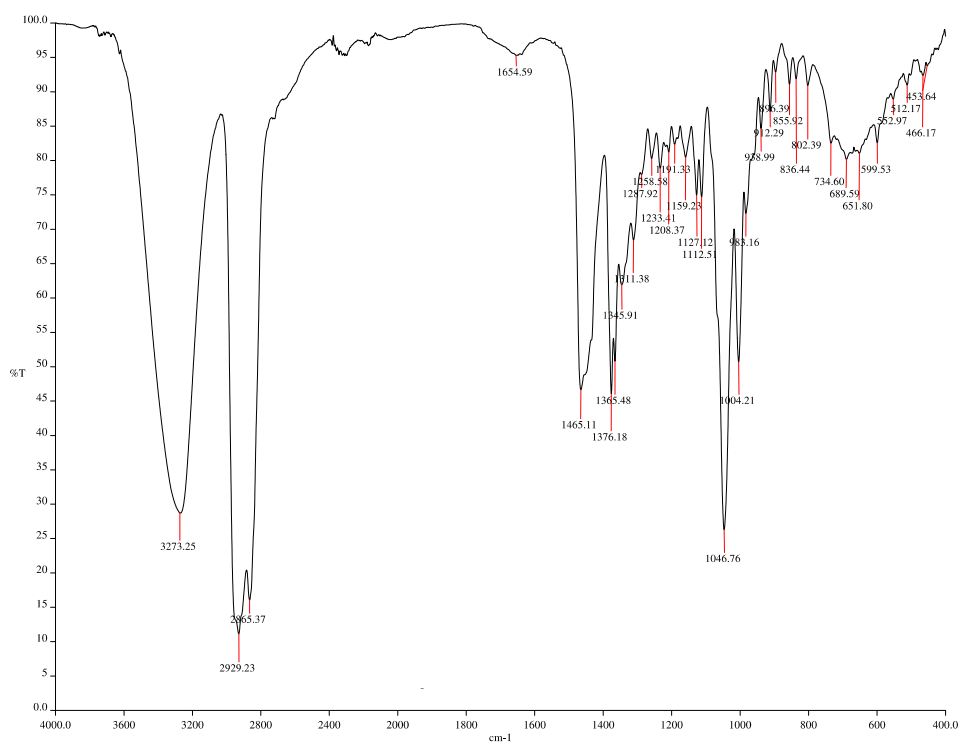

**Figure S10.** FTIR spectrum by ATR of peniocerol (**2**)

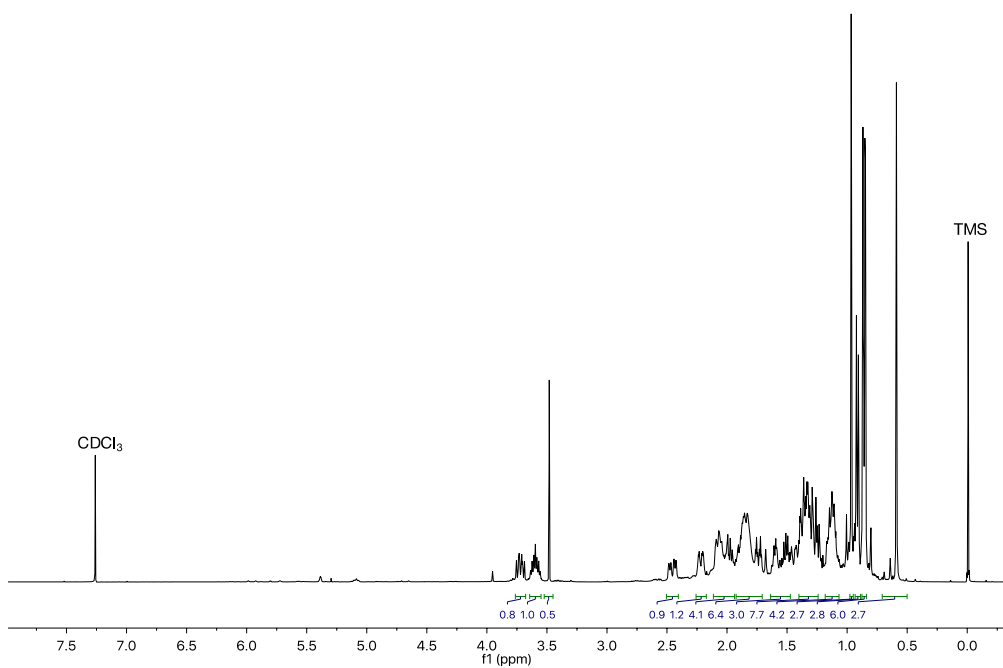

**Figure S11.**  $^1\text{H}$  NMR spectrum of peniocerol (**2**) in  $\text{CDCl}_3$

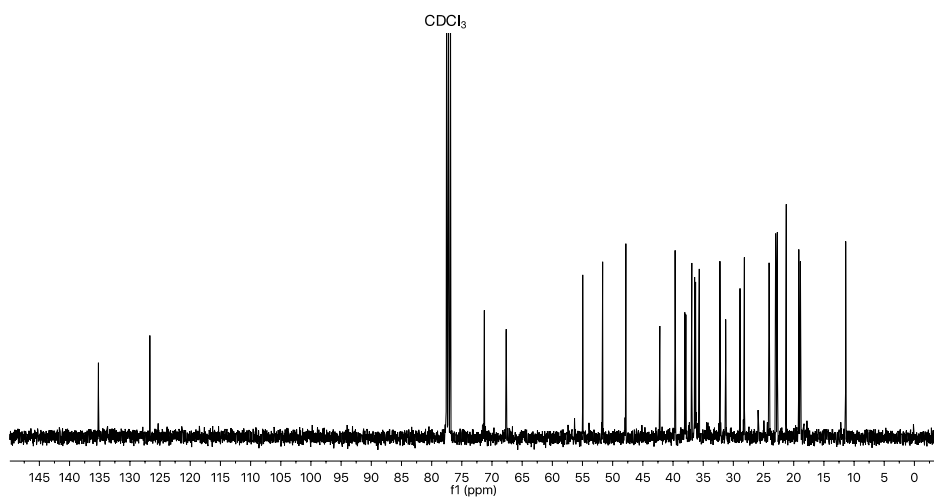

**Figure S12.**  $^{13}\text{C}$  NMR spectrum of peniocerol (**2**) in  $\text{CDCl}_3$

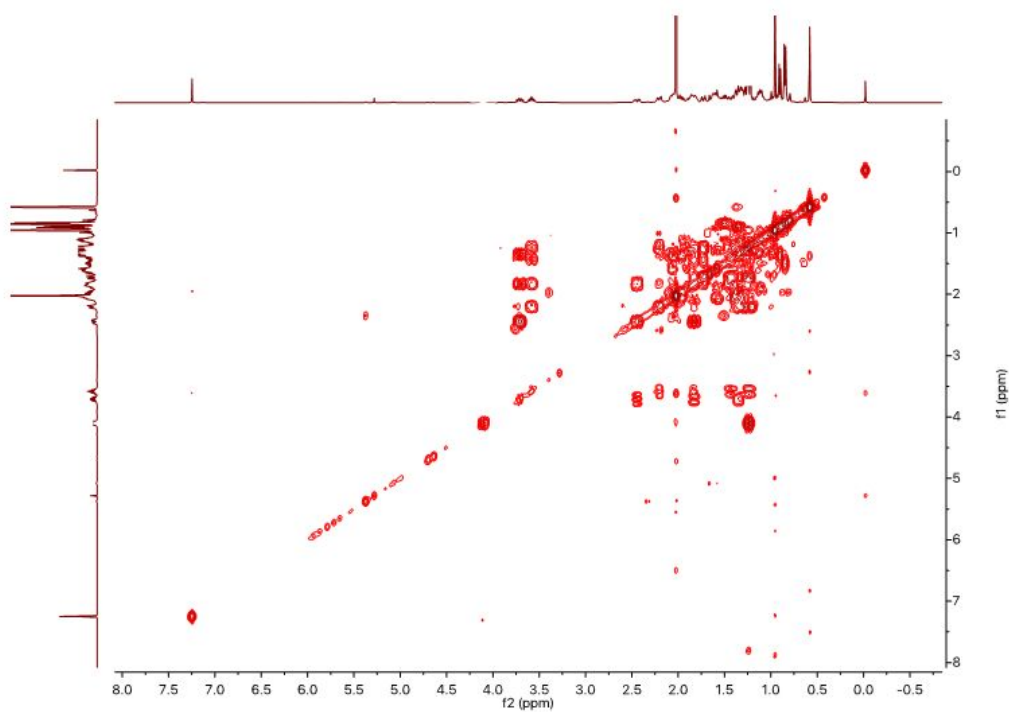

**Figure S13.** COSY spectrum of peniocerol (**2**) in  $\text{CDCl}_3$

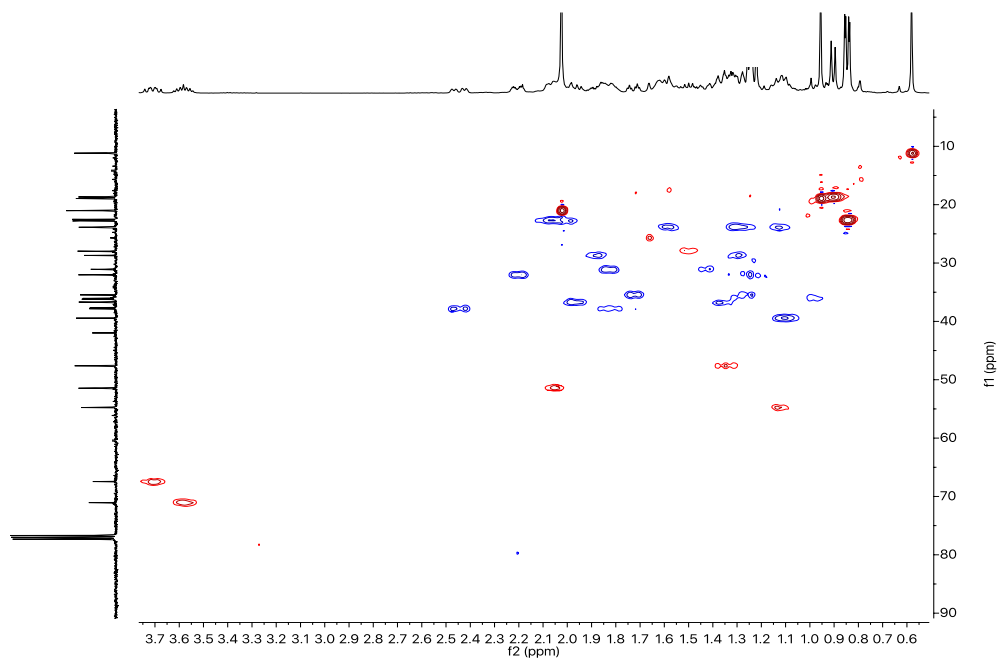

**Figure S14.** HSQC spectrum of peniocerol (**2**) in  $\text{CDCl}_3$

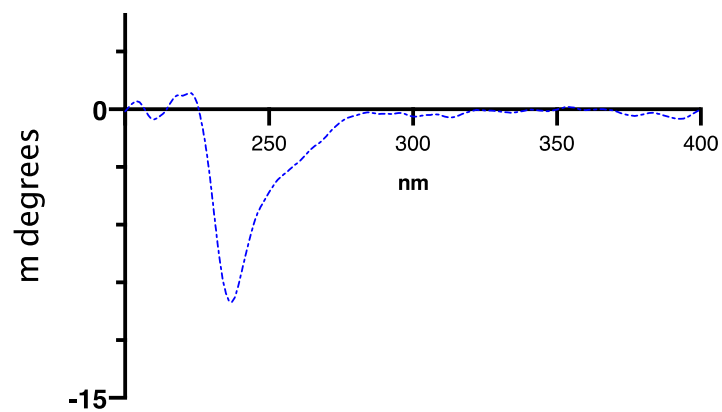

**Figure S15.** ECD spectrum of peniocerol (**2**) in  $\text{CDCl}_3$

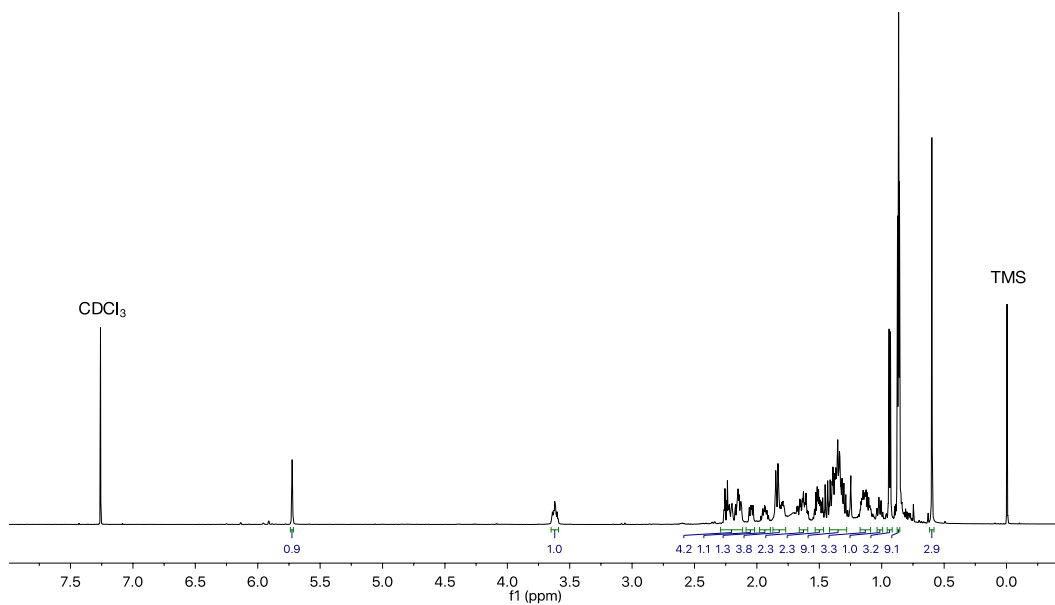

**Figure S16.**  $^1\text{H}$  NMR spectrum of desoxyviperidone (**3**) in  $\text{CDCl}_3$

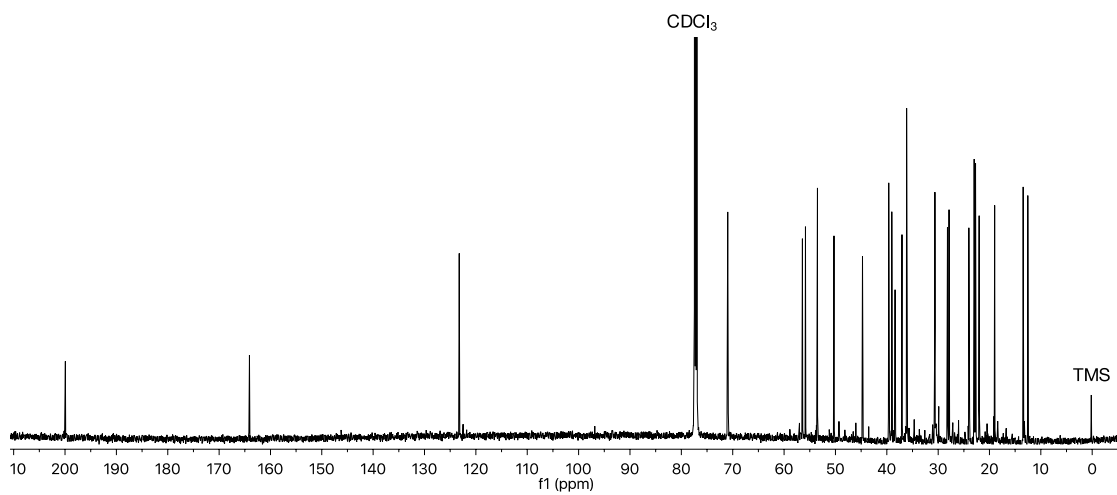

**Figure S17.**  $^{13}\text{C}$  NMR spectrum of desoxyviperidone (**3**) in  $\text{CDCl}_3$

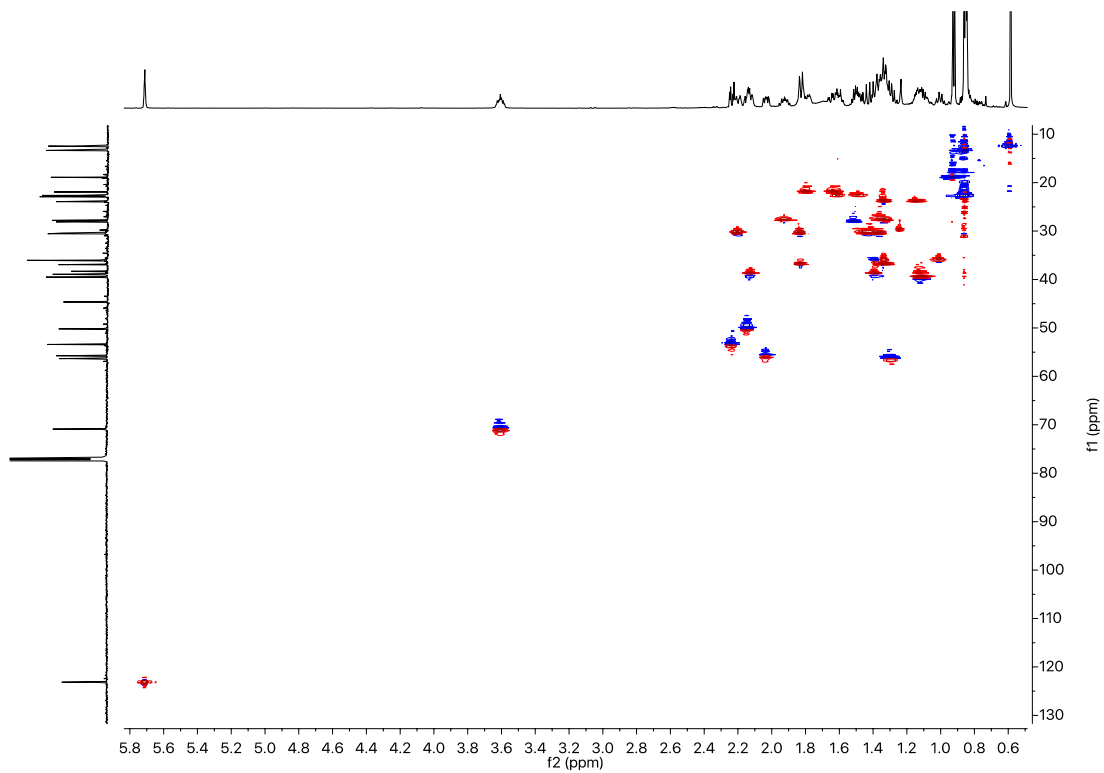

**Figure S18.** HSQC NMR spectrum of desoxyviperidone (**3**) in  $\text{CDCl}_3$

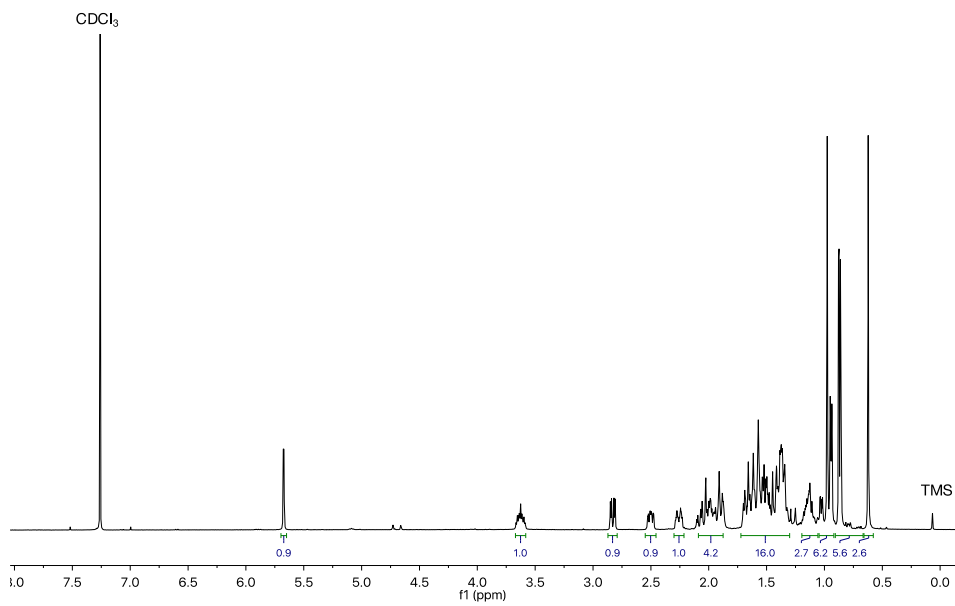

**Figure S19.**  $^1\text{H}$  NMR spectrum of viperidone (**4**) in  $\text{CDCl}_3$

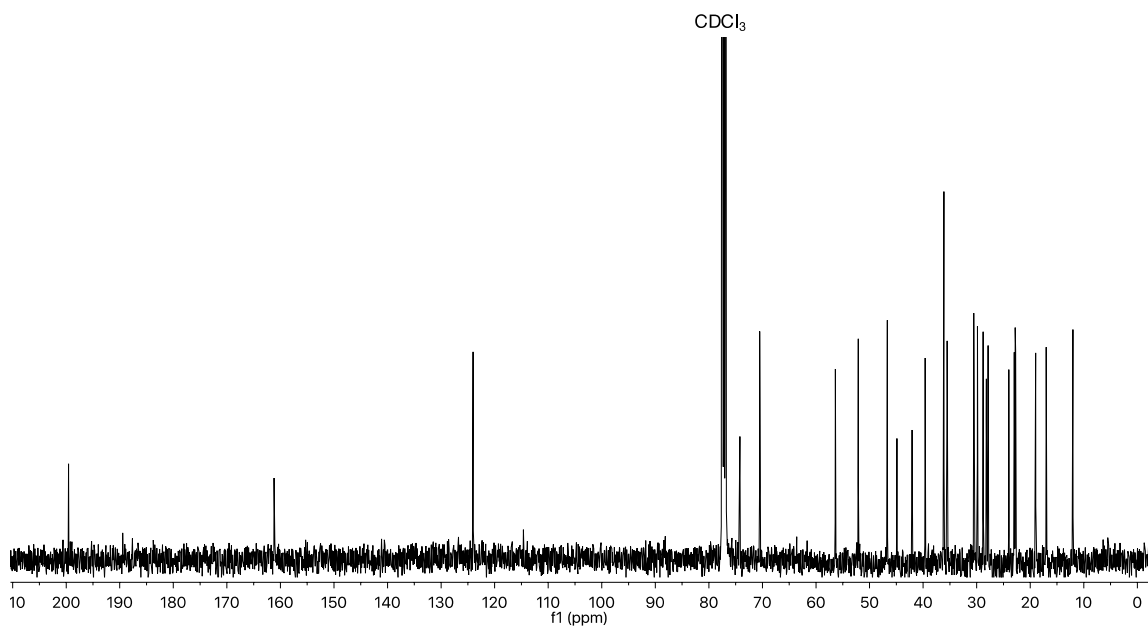

**Figure S20.**  $^{13}\text{C}$  NMR spectrum of viperidone (4) in  $\text{CDCl}_3$

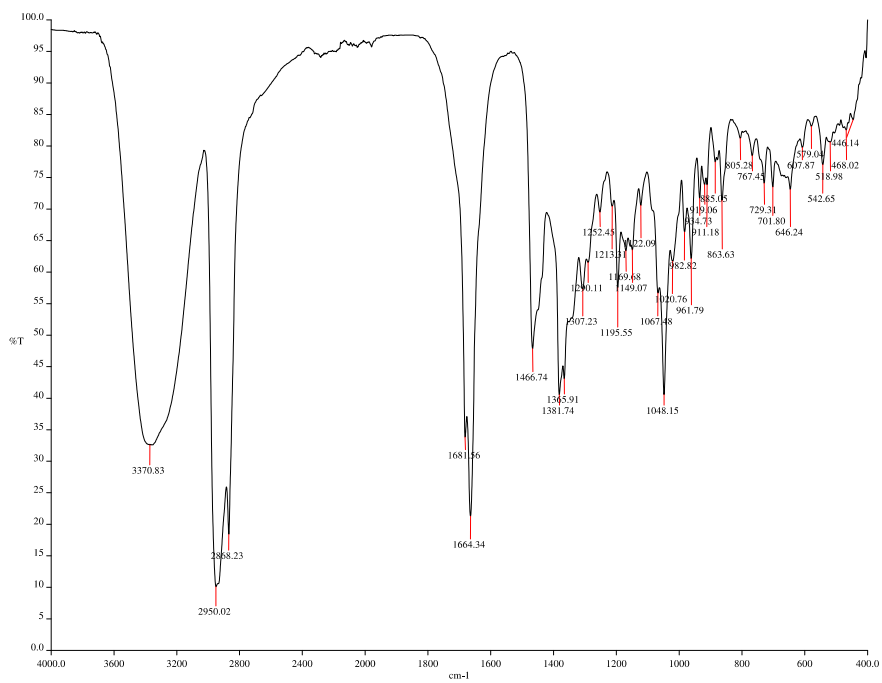

**Figure S21.** FTIR spectrum by ATR of viperidinone (5)

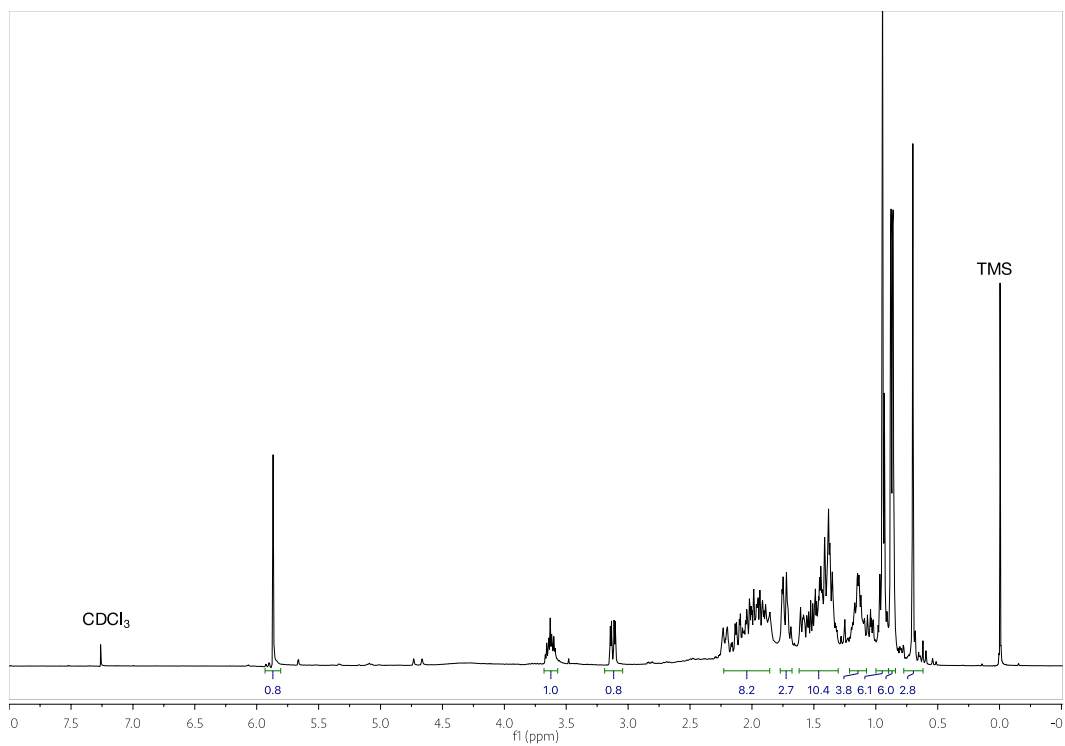

**Figure S22.** <sup>1</sup>H NMR spectrum of viperidinone (**5**) in CDCl<sub>3</sub>

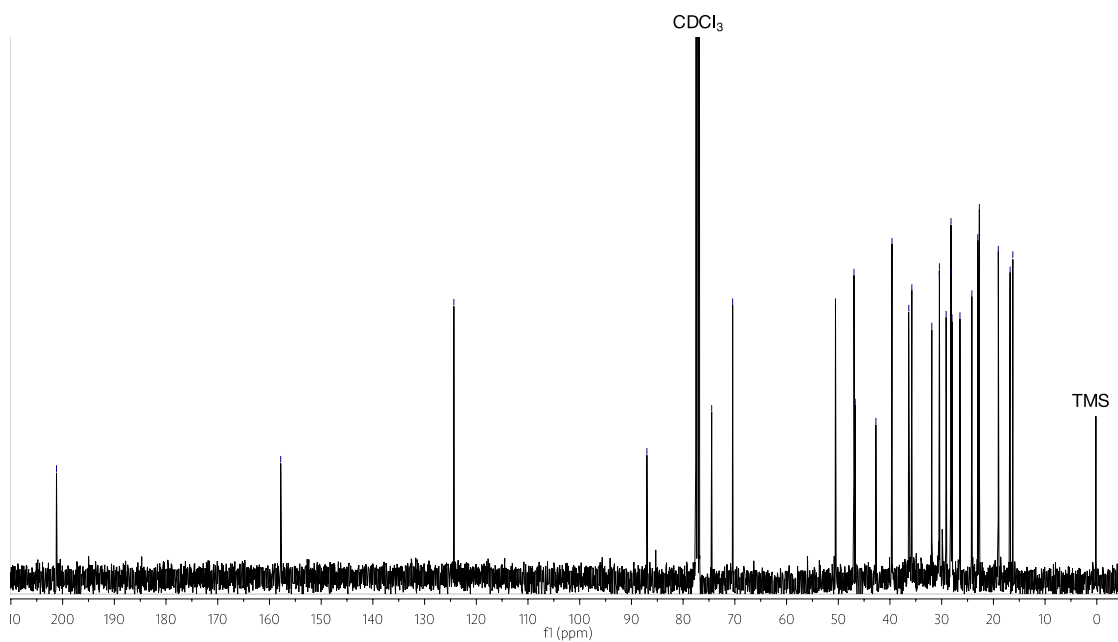

**Figure S23.** <sup>13</sup>C NMR spectrum of viperidinone (**5**) in CDCl<sub>3</sub>



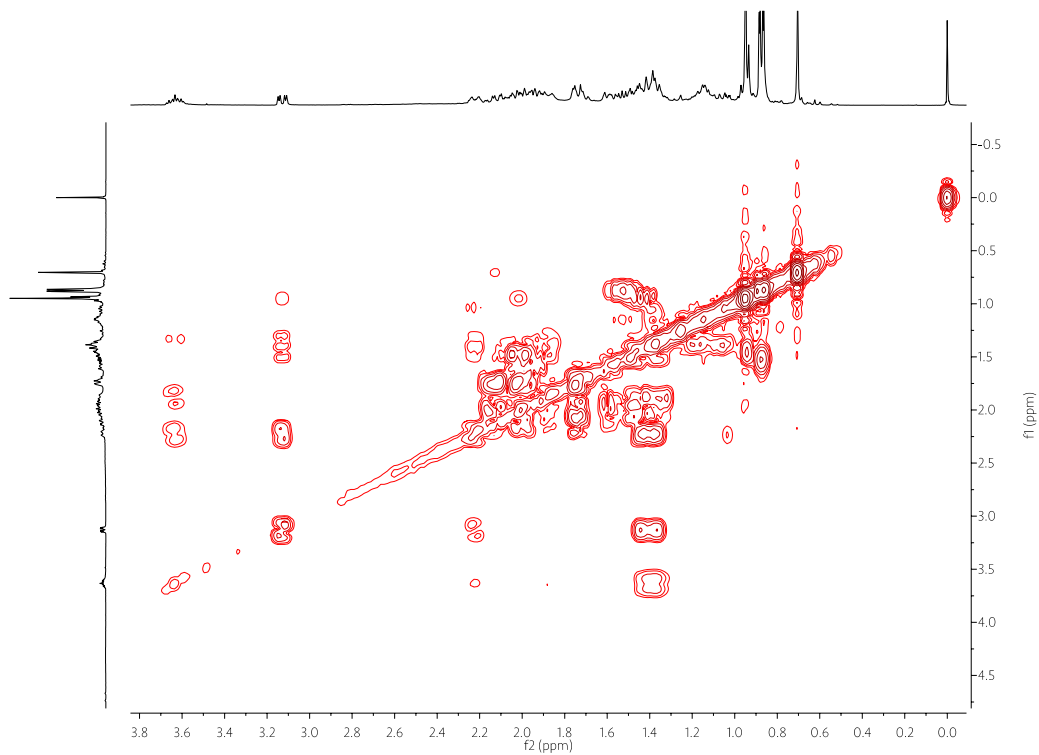

**Figure S24.** COSY NMR spectrum of viperidinone (**5**) in  $\text{CDCl}_3$

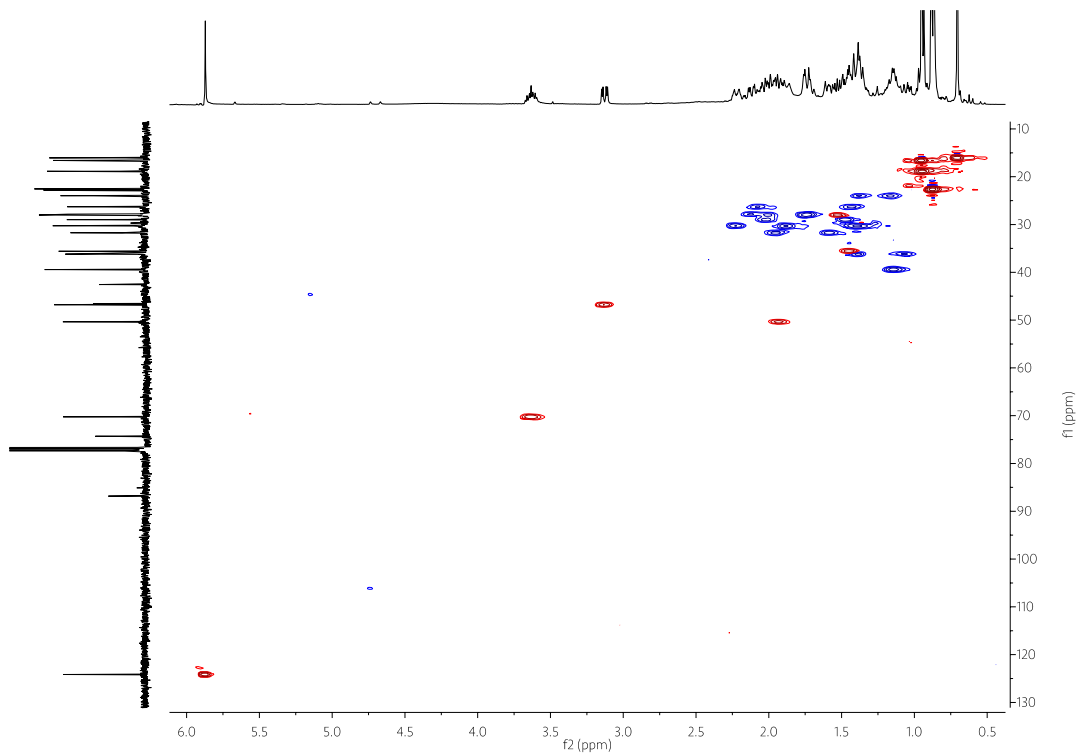

**Figure S25.** HSQC NMR spectrum of viperidinone (**5**) in  $\text{CDCl}_3$

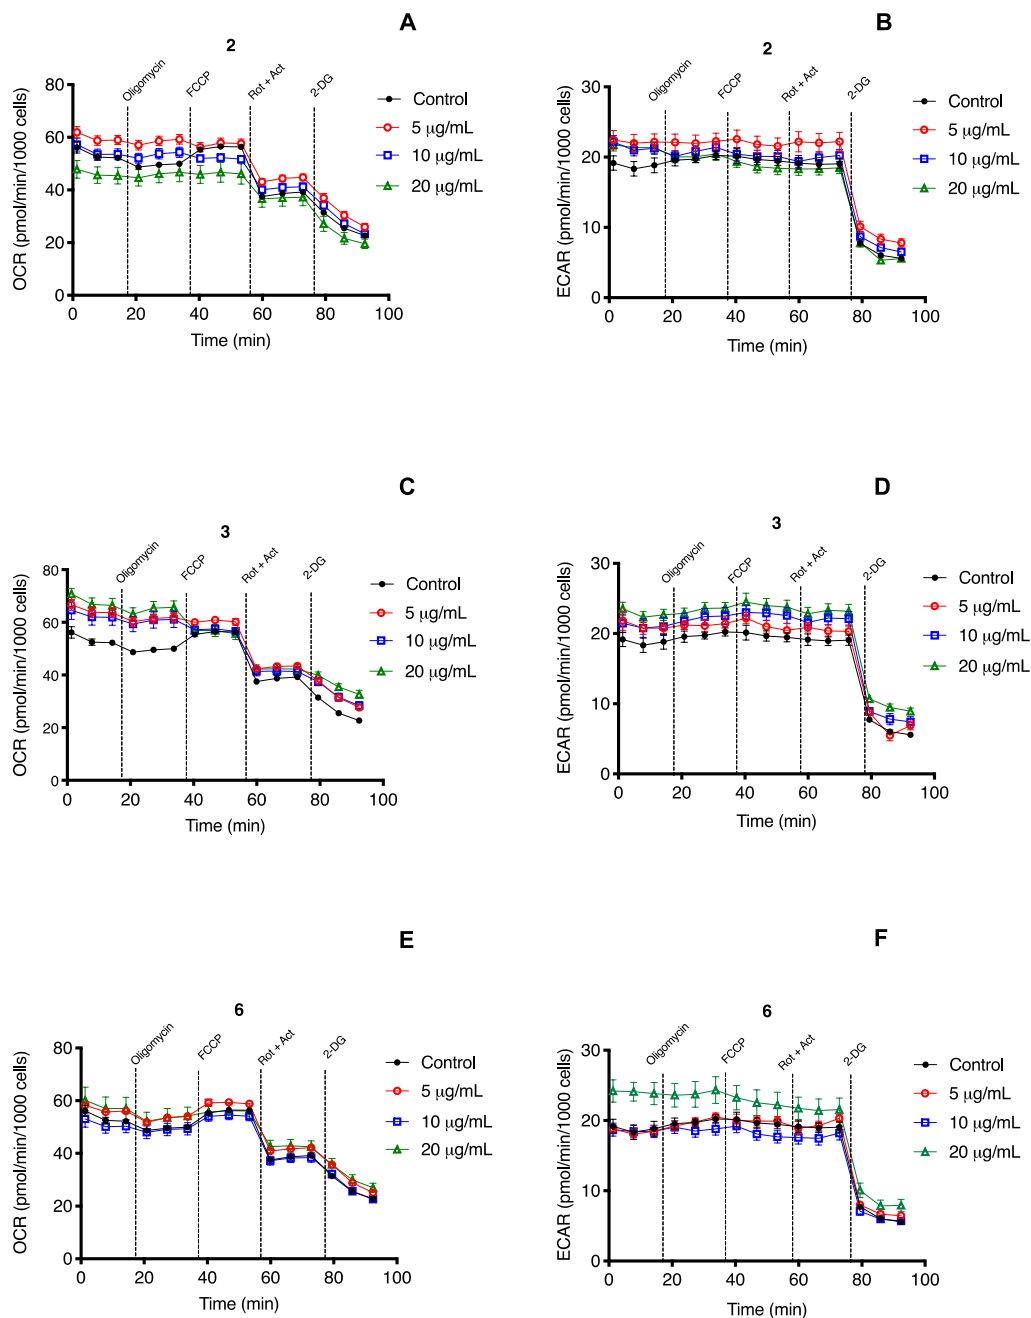

**Figure S26.** Oxygen consumption rate (A, C and E) and extracellular acidification rate (B, D and F) in mouse myoblast cells C2C12 for compounds **2**, **3** and **6**. Each point represents the mean  $\pm$  SEM of three independent experiments. \*\*\*  $p < 0.01$  and \*\*\*\*  $p < 0.0001$  significantly different. ANOVA followed by Tukey *post hoc* test for comparison with respect to control.

**Table S2.** Linearity, Sensitivity, Precision and Accuracy for **3** and **4**

|                                                   | <b>3</b>                      | <b>4</b>                      |
|---------------------------------------------------|-------------------------------|-------------------------------|
| <b>Calibration curve equation</b>                 |                               |                               |
| UV detection                                      | $y = 11339.72x - 15272.90$    | $y = 151541.56x - 17617.53$   |
| MS detection                                      | $y = 2811132.97x - 440840.39$ | $y = 3229290.07x - 743236.71$ |
| <b>Correlation coefficient (<math>R^2</math>)</b> |                               |                               |
| UV detection                                      | 0.9935                        | 0.9963                        |
| MS detection                                      | 0.9915                        | 0.9950                        |
| <b>LOD (<math>\mu\text{g/mL}</math>)</b>          |                               |                               |
| UV detection                                      | 0.6                           | 1.81                          |
| MS detection                                      | 1.18                          | 3.60                          |
| <b>LOQ (<math>\mu\text{g/mL}</math>)</b>          |                               |                               |
| UV detection                                      | 1.03                          | 3.13                          |
| MS detection                                      | 1.17                          | 3.53                          |
| <b>Precision (RSD %)</b>                          |                               |                               |
| Intra-day                                         |                               |                               |
| UV detection                                      | 1.9                           | 0.4                           |
| MS detection                                      | 1.1                           | 0.3                           |
| Inter-day                                         |                               |                               |
| UV detection                                      | 0.5                           | 0.9                           |
| MS detection                                      | 1.1                           | 0.7                           |
| <b>Recovery (%)</b>                               |                               |                               |
| UV detection                                      | 98.8–101.1                    | 100.3–100.4                   |
| MS detection                                      | 99.5–100.4                    | 100.4–100.6                   |

**Table S3.** Quantification of **3** and **4** (Batches I-IV) from *P. greggii* using the method validated.

| Sample (Batch) | Mean content (mg/g) |                             |              |                             |
|----------------|---------------------|-----------------------------|--------------|-----------------------------|
|                | <b>3</b>            |                             | <b>4</b>     |                             |
|                | UV detection        | APCI <sup>+</sup> detection | UV detection | APCI <sup>+</sup> detection |
| I              | 68.0 ± 1.5          | 52.0 ± 0.4                  | 225.3 ± 1.2  | 248.0 ± 0.7                 |
| II             | 21.3 ± 1.4          | 12.0 ± 0.2                  | 128.0 ± 1.1  | 116.0 ± 0.3                 |
| III            | 33.3 ± 1.6          | 21.3 ± 0.2                  | 168.0 ± 1.2  | 153.3 ± 0.4                 |
| IV             | 36.0 ± 1.4          | 22.7 ± 0.3                  | 177.3 ± 1.2  | 170.1 ± 0.3                 |
